# Supplementary material for: Gene Signature–Based Approach Identified MEK1/2 as a Potential Target Associated With Relapse After Anti-TNFα Treatment for Crohn’s Disease
Source: PubMed Central journal article supplement — Inflamm Bowel Dis. 2018 Apr 13;24(6):1251–65. doi: 10.1093/ibd/izy079 (PMC6176896; doi:10.1093/ibd/izy079), 2018-04-13
Supplement: izy079_suppl_supplementary_figure_1.pdf [file izy079_suppl_supplementary_figure_1.pdf]

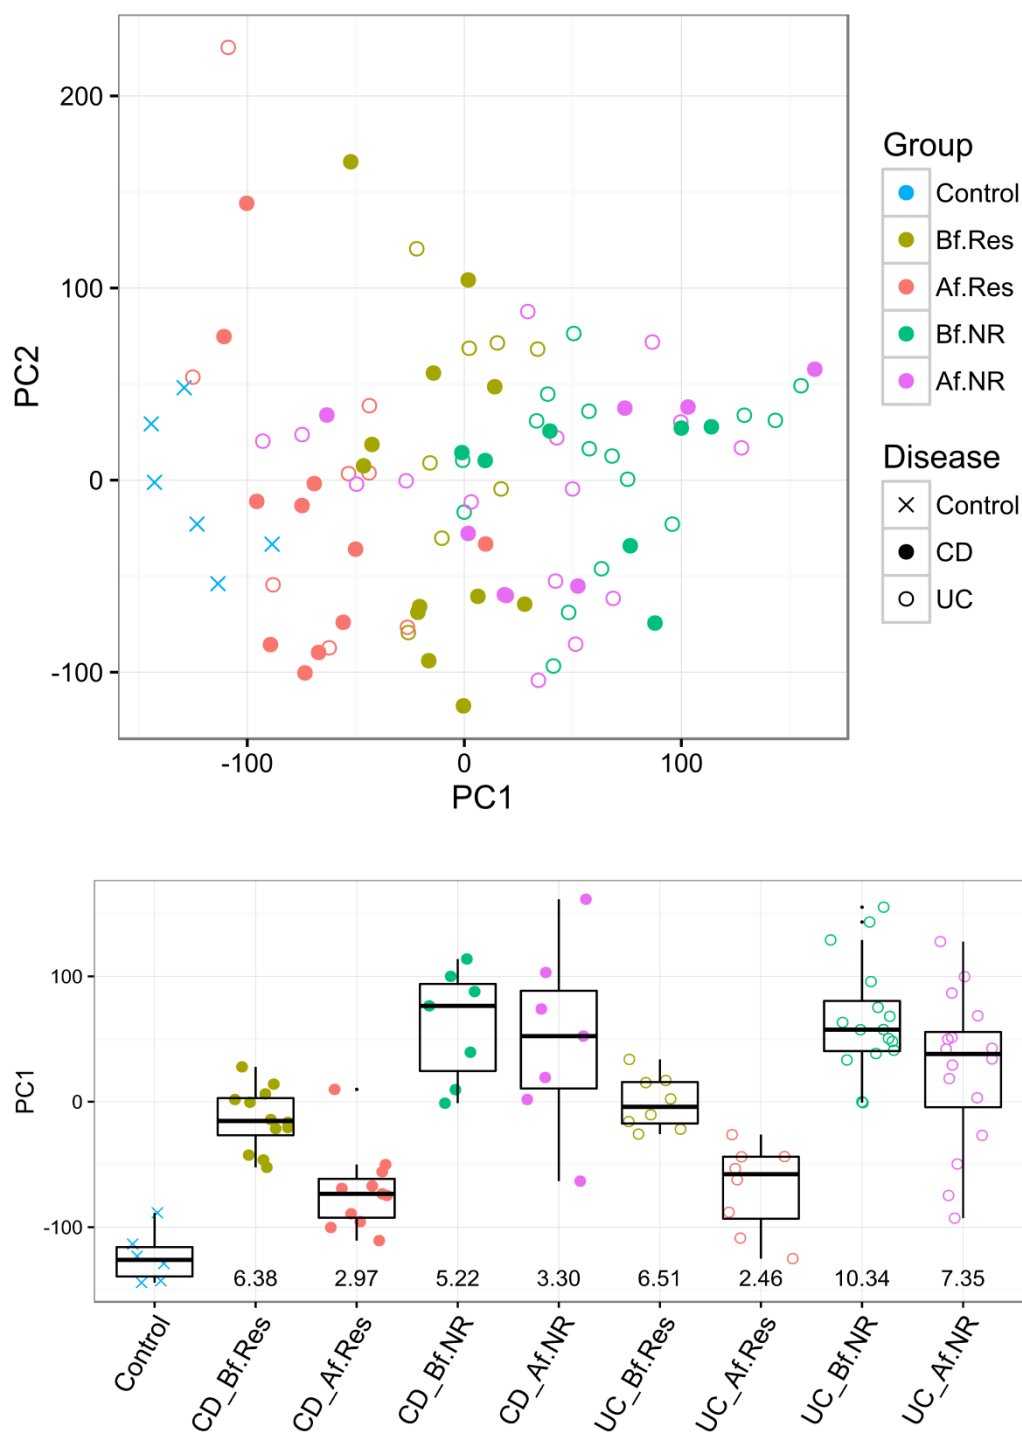

**Supplemental Figure 1.**

PCA of colonic expression data from 19 CD patients (12 responders and 7 non-responders), 24 UC patients (8 responders and 16 non-responders) at the time of pre- and post-infliximab treatment and from 6 healthy controls. Boxplots of PC1 distribution for each group and *P* values (-Log10) from control group are also indicated.
