# Supplementary material for: Gene Signature–Based Approach Identified MEK1/2 as a Potential Target Associated With Relapse After Anti-TNFα Treatment for Crohn’s Disease
Source: PubMed Central journal article supplement — Inflamm Bowel Dis. 2018 Apr 13;24(6):1251–65. doi: 10.1093/ibd/izy079 (PMC6176896; doi:10.1093/ibd/izy079), 2018-04-13
Supplement: izy079_suppl_supplementary_figure_2.pdf [file izy079_suppl_supplementary_figure_2.pdf]

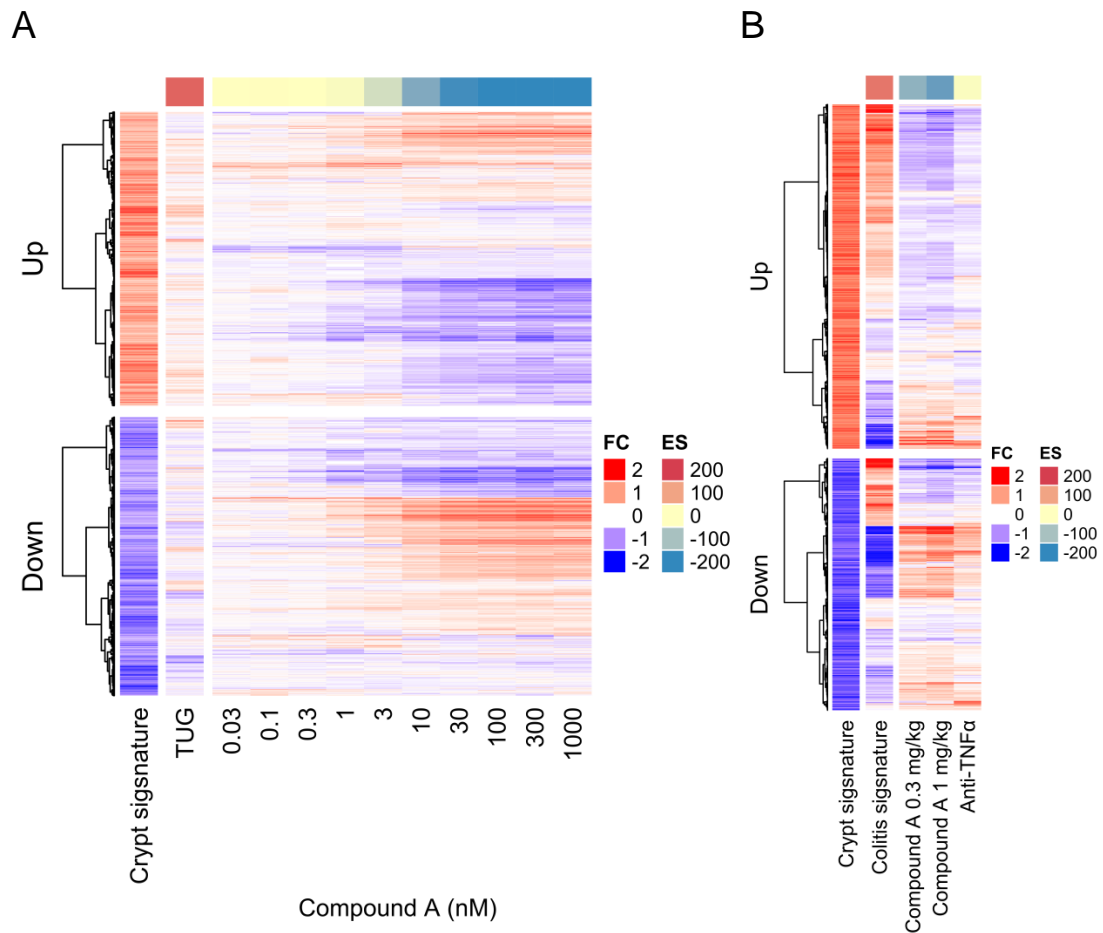

**Supplemental Figure 2.**

(A) Heatmap illustrating hierarchical clustering of human EphB2<sup>high</sup> vs. EphB2<sup>low</sup> immature crypt signature comparing with fold change in gene expression levels in LoVo treated with Compound A across ten dose response conditions (0.03-1,000 nM, n = 3). (B) Heatmap illustrating hierarchical clustering of mouse EphB2<sup>high</sup> vs. EphB2<sup>low</sup> immature crypt signature and colitis signature comparing with fold change in gene expression levels in murine colitis model treated with Compound A at the dose of 0.3 and 1 mg/kg and anti-TNF $\alpha$  mAb. The color-coded scale for the normalized expression value is indicated at the right of the figure, which correlates with color intensity to the fold change of gene expression and enrichment score.
