# Supplementary material for: Gene Signature–Based Approach Identified MEK1/2 as a Potential Target Associated With Relapse After Anti-TNFα Treatment for Crohn’s Disease
Source: PubMed Central journal article supplement — Inflamm Bowel Dis. 2018 Apr 13;24(6):1251–65. doi: 10.1093/ibd/izy079 (PMC6176896; doi:10.1093/ibd/izy079), 2018-04-13
Supplement: izy079_suppl_supplementary_figure_3.pdf [file izy079_suppl_supplementary_figure_3.pdf]

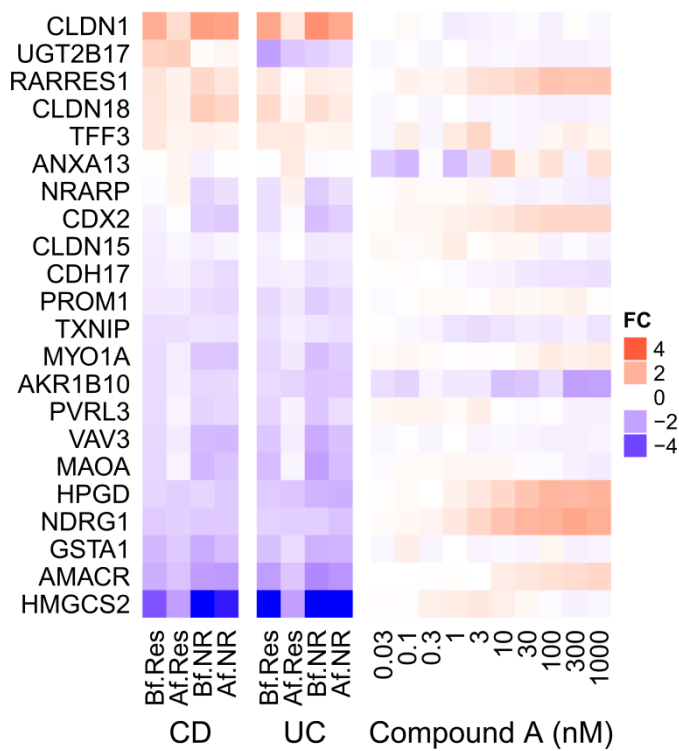

**Supplemental Figure 3.**

Heatmap showing the transcripts which linked to intestinal differentiation including several previously identified CDX2 target genes for both CD and UC patients and compared with fold change in LoVo treated with Compound A under the same condition as above. The color-coded scale for the normalized expression value is indicated at the right of the figure, which correlates with color intensity to the fold change of gene expression.
