# Supplementary material for: Gene Signature–Based Approach Identified MEK1/2 as a Potential Target Associated With Relapse After Anti-TNFα Treatment for Crohn’s Disease
Source: PubMed Central journal article supplement — Inflamm Bowel Dis. 2018 Apr 13;24(6):1251–65. doi: 10.1093/ibd/izy079 (PMC6176896; doi:10.1093/ibd/izy079), 2018-04-13
Supplement: izy079_suppl_supplementary_figure_4.pdf [file izy079_suppl_supplementary_figure_4.pdf]

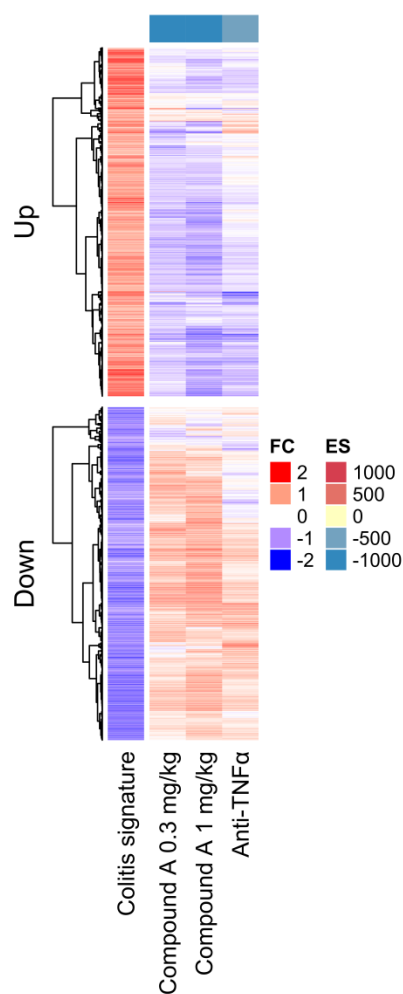

| Gene subsets                                     | Overlapped gene number | Coverage % of negative correlation |
|--------------------------------------------------|------------------------|------------------------------------|
| Compound A (0.3 mg/kg) DEGs vs colitis signature | 2,925                  | 30.9                               |
| Compound A (1 mg/kg) DEGs vs colitis signature   | 4,363                  | 46.1                               |
| Anti-TNF $\alpha$ Ab DEGs vs colitis signature   | 1,106                  | 11.1                               |

#### Supplemental Figure 4.

Heatmap illustrating hierarchical clustering of colitis signature (vehicle versus normal mice) clustered into up-regulated and down-regulated genes comparing with fold change in gene expression levels in murine colitis model treated with Compound A at the dose of 0.3 and 1 mg/kg and anti-TNF $\alpha$  mAb. The color-coded scale for the normalized expression value is indicated at the right of the figure, which correlates with color intensity to the fold change of gene expression and enrichment score. Overlapped gene number between each DEGs and colitis signature, and each coverage rate of negative correlation were indicated at the below.
