# Supplementary material for: Gene Signature–Based Approach Identified MEK1/2 as a Potential Target Associated With Relapse After Anti-TNFα Treatment for Crohn’s Disease
Source: PubMed Central journal article supplement — Inflamm Bowel Dis. 2018 Apr 13;24(6):1251–65. doi: 10.1093/ibd/izy079 (PMC6176896; doi:10.1093/ibd/izy079), 2018-04-13
Supplement: izy079_suppl_supplementary_table_1.pdf [file izy079_suppl_supplementary_table_1.pdf]

**Supplemental Table 1.** Histopathological scoring system

|                                  | Score | Grade    | Criteria                                                                                                                                                                                             |
|----------------------------------|-------|----------|------------------------------------------------------------------------------------------------------------------------------------------------------------------------------------------------------|
| Mucosal regeneration/hyperplasia | 0     | None     | Not remarkable                                                                                                                                                                                       |
|                                  | 1     | Minimal  | Regeneration/hyperplasia of mucosa without goblet cells are observed in focal area.                                                                                                                  |
|                                  | 2     | Mild     | Regeneration/hyperplasia of mucosa are observed diffusely with 2-fold mucosal thickness. Goblet cells are observed diffusely and occasionally crypt abscesses and cell debris in lumen are observed. |
|                                  | 3     | Moderate | Regeneration/hyperplasia of mucosa are observed diffusely with 2- to 3-fold mucosal thickness. Goblet cells are observed focally and often crypt abscesses and cell debris in lumen are observed.    |
|                                  | 4     | Marked   | Regeneration/hyperplasia of mucosa are observed diffusely with 4- to 5-fold mucosal thickness. Goblet cells are scant and crypt abscesses and cell debris in lumen are observed diffusely.           |
| Mononuclear cell infiltration    | 0     | None     | Not remarkable                                                                                                                                                                                       |
|                                  | 1     | Minimal  | Focal or multifocal infiltration of mononuclear cells (mainly lymphocytes) in mucosa and/or submucosa                                                                                                |
|                                  | 2     | Mild     | Diffuse infiltration of mononuclear cells (mainly lymphocytes) in mucosa and/or submucosa with focally extended area of lamina propria.                                                              |
|                                  | 3     | Moderate | Diffuse infiltration of mononuclear cells (mainly lymphocytes and some neutrophils) in mucosa and/or submucosa with focally and/or diffusely extended area of lamina propria.                        |
|                                  | 4     | Marked   | Diffuse infiltration of mononuclear cells (mainly lymphocytes and some neutrophils) in mucosa and/or submucosa with more diffusely extended area of lamina propria.                                  |
