# Supplementary material for: Gene Signature–Based Approach Identified MEK1/2 as a Potential Target Associated With Relapse After Anti-TNFα Treatment for Crohn’s Disease
Source: PubMed Central journal article supplement — Inflamm Bowel Dis. 2018 Apr 13;24(6):1251–65. doi: 10.1093/ibd/izy079 (PMC6176896; doi:10.1093/ibd/izy079), 2018-04-13
Supplement: izy079_suppl_supplementary_table_2.pdf [file izy079_suppl_supplementary_table_2.pdf]

**Supplemental Table 2. Histopathological findings of the colon**

| Treatment                        | Normal |     |     |     |
|----------------------------------|--------|-----|-----|-----|
| Test article                     | -      |     |     |     |
| Dose (mg/kg/day)                 | -      |     |     |     |
| Animal No.                       | 1-1    | 1-2 | 1-3 | 1-4 |
| Mucosal regeneration/hyperplasia | 0      | 0   | 0   | 0   |
| Mononuclear cell infiltration    | 0      | 0   | 0   | 0   |
| Histology score of colitis       | 0      | 0   | 0   | 0   |
| mean ± SE                        | 0.0    | ±   | 0.0 |     |

  

| Treatment                        | Con A-activated CD4+ T-cell transfer |     |     |     |     |     |     |                        |     |     |     |     |     |     |                        |     |     |     |     |     |     |
|----------------------------------|--------------------------------------|-----|-----|-----|-----|-----|-----|------------------------|-----|-----|-----|-----|-----|-----|------------------------|-----|-----|-----|-----|-----|-----|
| Test article                     | Vehicle (0.5% MC)                    |     |     |     |     |     |     | Enteric Compound A MPs |     |     |     |     |     |     | Enteric Compound A MPs |     |     |     |     |     |     |
| Dose (mg/kg/day)                 | 0 QD                                 |     |     |     |     |     |     | 0.3 QD                 |     |     |     |     |     |     | 1 QD                   |     |     |     |     |     |     |
| Animal No.                       | 2-1                                  | 2-2 | 2-3 | 2-4 | 2-5 | 2-6 | 2-7 | 3-1                    | 3-2 | 3-3 | 3-4 | 3-5 | 3-6 | 3-7 | 4-1                    | 4-2 | 4-3 | 4-4 | 4-5 | 4-6 | 4-7 |
| Mucosal regeneration/hyperplasia | 4                                    | 3   | 3   | 4   | 1   | 1   | 3   | 1                      | 0   | 1   | 3   | 3   | 3   | 0   | 0                      | 2   | 0   | 1   | 0   | 4   | 0   |
| Mononuclear cell infiltration    | 4                                    | 3   | 2   | 3   | 2   | 1   | 2   | 1                      | 0   | 1   | 3   | 3   | 3   | 1   | 1                      | 2   | 1   | 1   | 0   | 3   | 0   |
| Histology score of colitis       | 8                                    | 6   | 5   | 7   | 3   | 2   | 5   | 2                      | 0   | 2   | 6   | 6   | 6   | 1   | 1                      | 4   | 1   | 2   | 0   | 7   | 0   |
| mean ± SE                        | 5.1                                  | ±   | 0.8 |     |     |     |     | 3.3                    | ±   | 1.0 |     |     |     |     | 2.1                    | ±   | 1.0 |     |     |     |     |

  

| Treatment                        | Con A-activated CD4+ T-cell transfer |     |     |     |     |     |     |                       |     |     |     |     |     |     |
|----------------------------------|--------------------------------------|-----|-----|-----|-----|-----|-----|-----------------------|-----|-----|-----|-----|-----|-----|
| Test article                     | Isotype mAb                          |     |     |     |     |     |     | anti-TNF $\alpha$ mAb |     |     |     |     |     |     |
| Dose (mg/kg/day)                 | 5 Q4D                                |     |     |     |     |     |     | 5 Q4D                 |     |     |     |     |     |     |
| Animal No.                       | 5-1                                  | 5-2 | 5-3 | 5-4 | 5-5 | 5-6 | 5-7 | 6-1                   | 6-2 | 6-3 | 6-4 | 6-5 | 6-6 | 6-7 |
| Mucosal regeneration/hyperplasia | 3                                    | 2   | 3   | 2   | 3   | 4   | 2   | 3                     | 2   | 3   | 0   | 0   | 3   | 2   |
| Mononuclear cell infiltration    | 3                                    | 2   | 3   | 2   | 3   | 3   | 3   | 2                     | 2   | 2   | 0   | 1   | 2   | 2   |
| Histology score of colitis       | 6                                    | 4   | 6   | 4   | 6   | 7   | 5   | 5                     | 4   | 5   | 0   | 1   | 5   | 4   |
| mean ± SE                        | 5.4                                  | ±   | 0.4 |     |     |     |     | 3.4                   | ±   | 0.8 |     |     |     |     |

0: Not remarkable, 1: Minimal, 2: Mild, 3: Moderate, 4: Marked

MC: methylcellulose solution

Histology score of colitis for each animal represents the sum of grades of all findings in the colon.
